# Supplementary material
Source: PubMed Central journal article supplement (PMC1877107)
Supplement: mbc_E06-04-0348_3.pdf [file mbc_E06-04-0348_3.pdf]

**F**

**MCF-7**

Cells transfected with

$\beta$ -cat FL #1

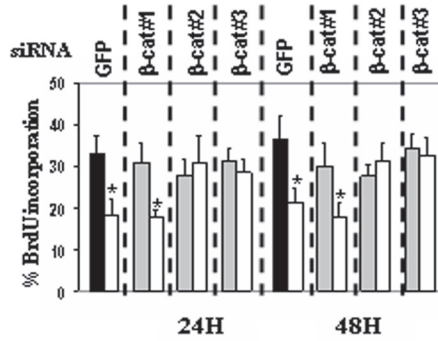

$\beta$ -cat FL #2

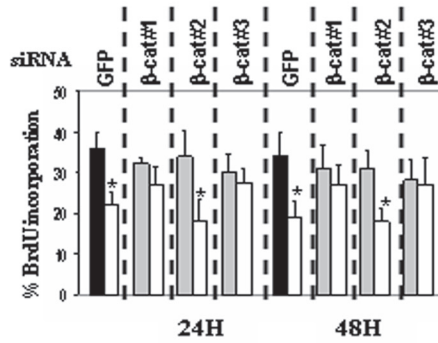

$\beta$ -cat FL #3

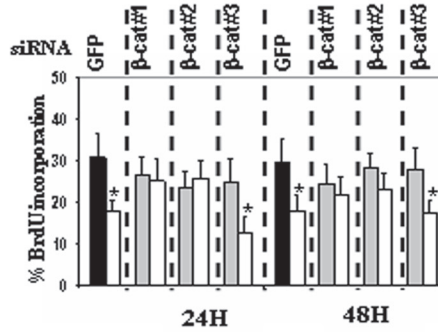

**G**

**SW480/E-cadherin FL**

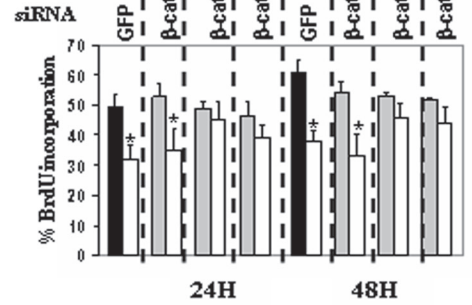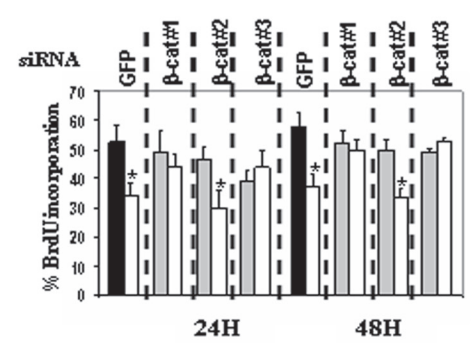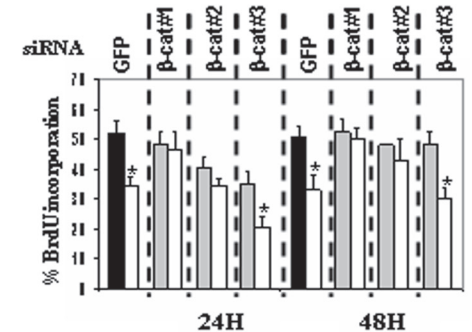

Beads coated with:  HLA  
 Fc-hE
