# Supplementary material
Source: PubMed Central journal article supplement (PMC1877107)

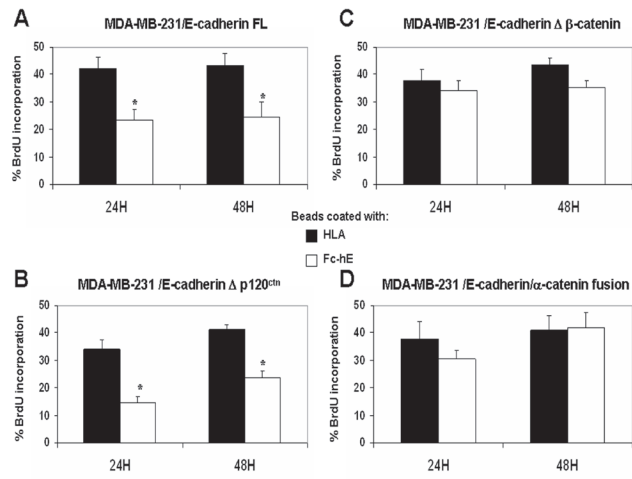

Supplement: mbc_E06-04-0348_1.pdf [file mbc_E06-04-0348_1.pdf]

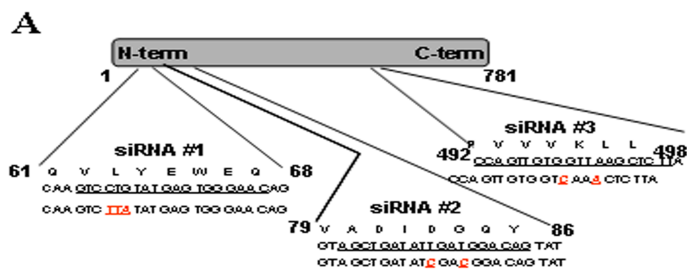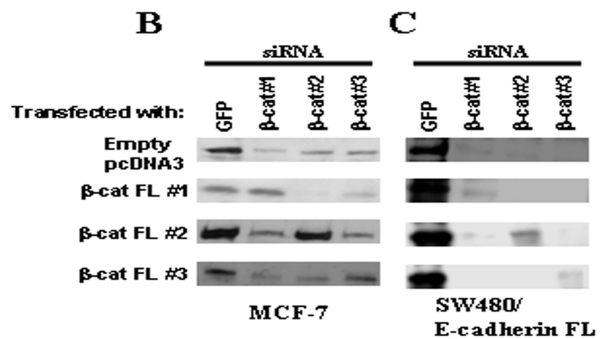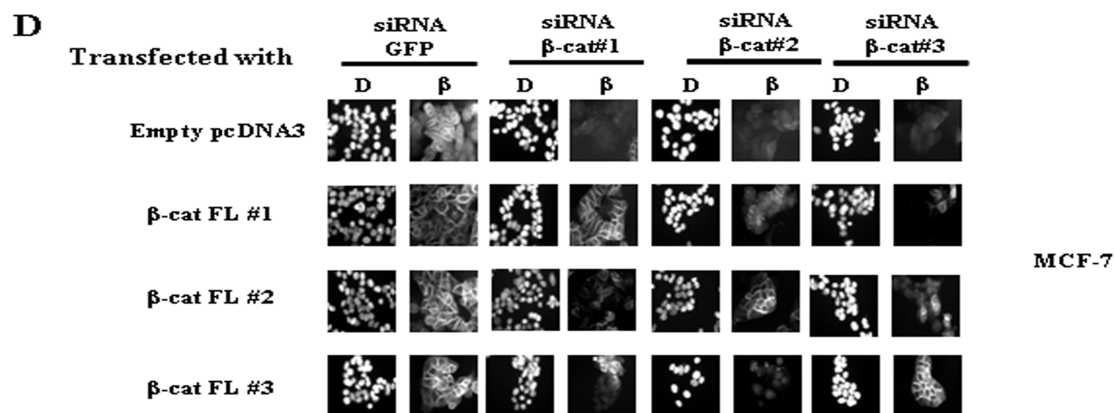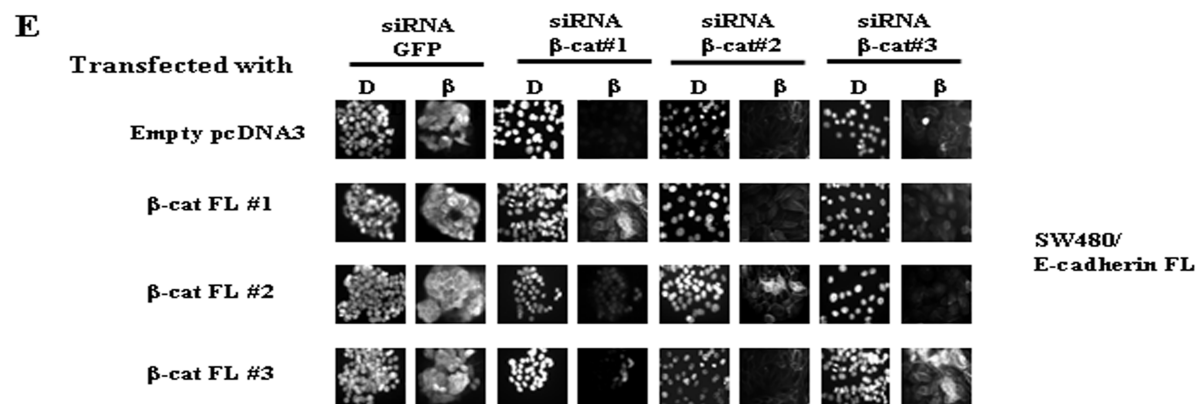

Supplement: mbc_E06-04-0348_2.pdf [file mbc_E06-04-0348_2.pdf]

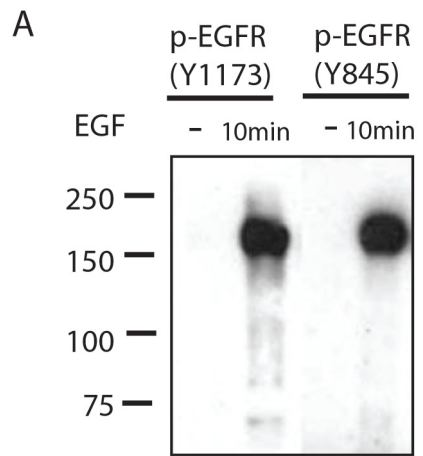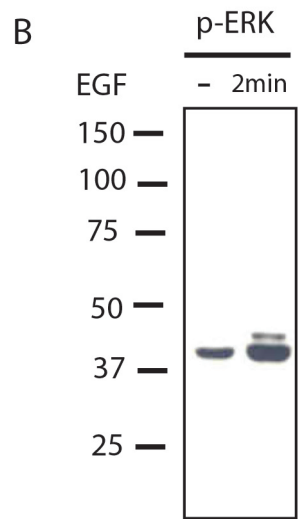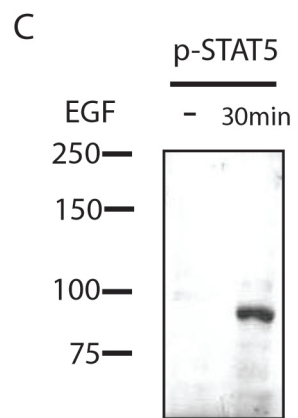

Supplement: mbc_E06-04-0348_4.pdf [file mbc_E06-04-0348_4.pdf]
